# Supplementary material for: Influenza A virus reassortment in mammals gives rise to genetically distinct within-host subpopulations
Source: PubMed Central journal article supplement (PMC9652339; doi:10.1038/s41467-022-34611-z), 2022-11-11
Supplement: 41467_2022_34611_MOESM3_ESM.pdf [file 41467_2022_34611_MOESM3_ESM.pdf]

### Description of Additional Supplementary Files

File Name: Supplementary Data 1

Description: . **Genotype tables.** Viral genotypes detected in guinea pigs, ferrets and swine are included. Each table corresponds to a biological sample and each row in each table corresponds to a single viral isolate. The columns show the eight viral gene segments. Blue color blocks indicate WT genes while red color blocks indicate VAR genes.

File Name: Supplementary Data 2

Description: **Identification of viral nucleoprotein positive cells present in ferret lung, pig lung and pig nasal turbinate.**

File Name: Supplementary Data 3

Description: **Primer sequences for NL09 WT/VAR HRM analysis**
